# Supplementary material for: Boron nitride multiwall nanotubes decorated with BN nanosheets
Source: Royal Society of Chemistry journal article supplement (doi:10.1039/c1ce05508a), 2011-01-01
Supplement: c1ce05508a.pdf [file c1ce05508a.pdf]

## Supporting information

# *Boron nitride multiwall nanotubes decorated with BN nanosheets*

*Mikhael Bechelany, Arnaud Brioude, Samuel Bernard, Pierre Stadelmann, David Cornu and Philippe*

*Miele*

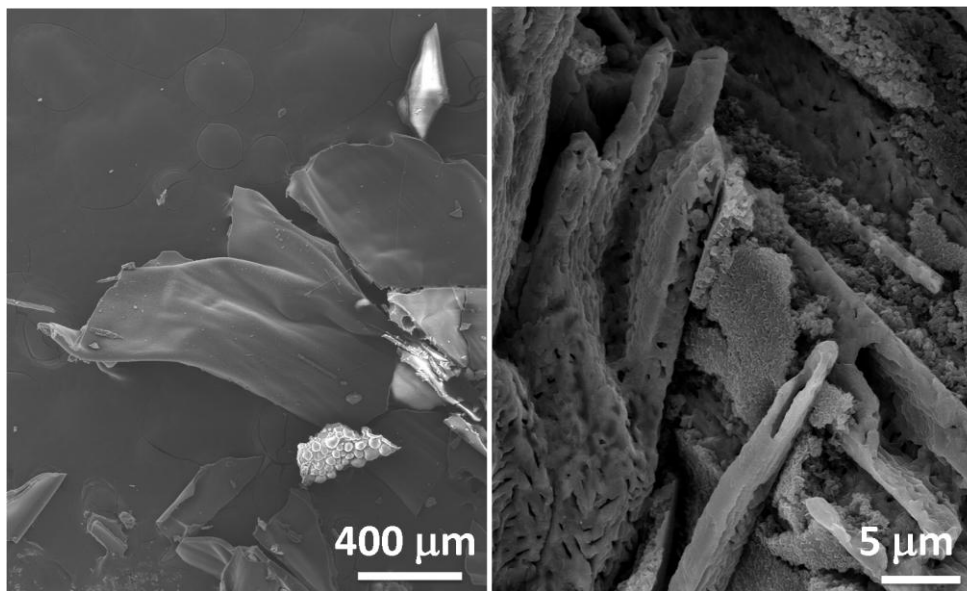

**Figure S1.** SEM images at different magnifications of BN powder obtained when experiments are conducted without amorphous carbon

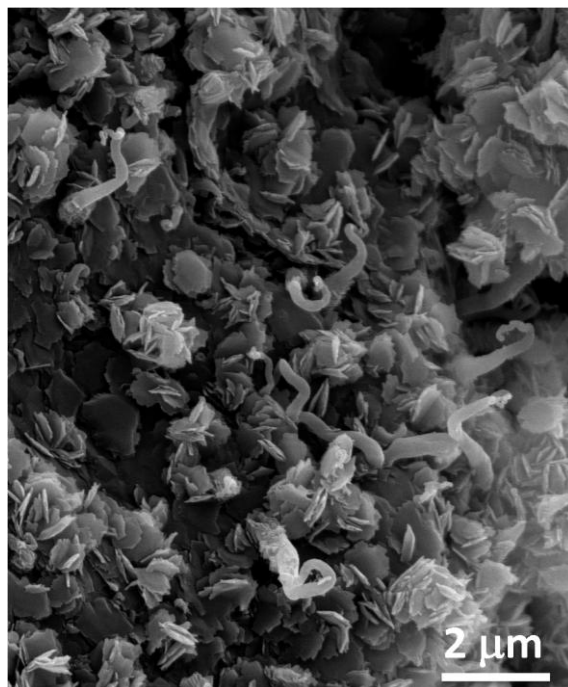

**Figure S2.** SEM image of BN powder obtained when experiments are conducted without carbon source

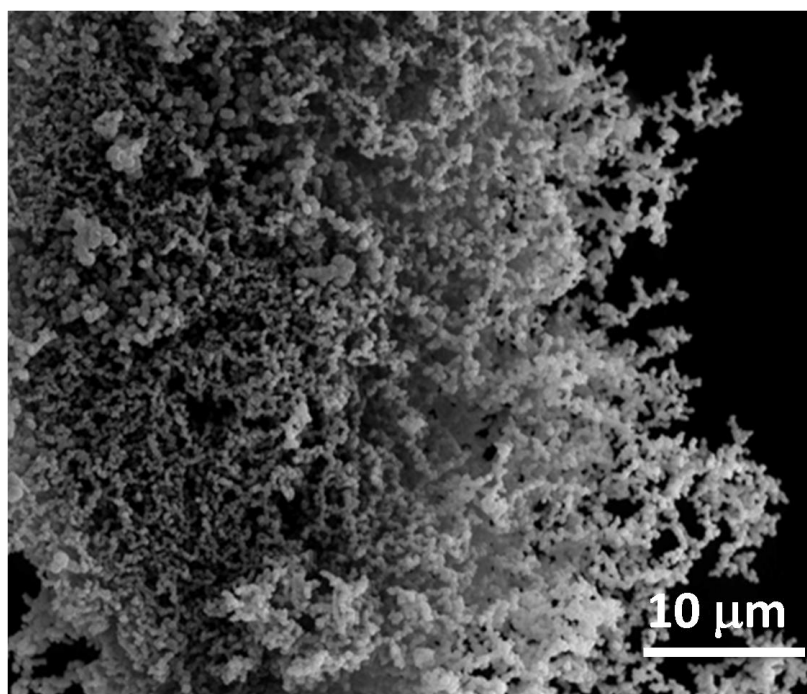

**Figure S3.** SEM image of nanostructured carbon coating formed on the condensation plate
